# Supplementary material for: A Novel Truncated Form of Serum Amyloid A in Kawasaki Disease
Source: PubMed Central journal article supplement (PMC4894573; doi:10.1371/journal.pone.0157024), 2016-06-06

**A**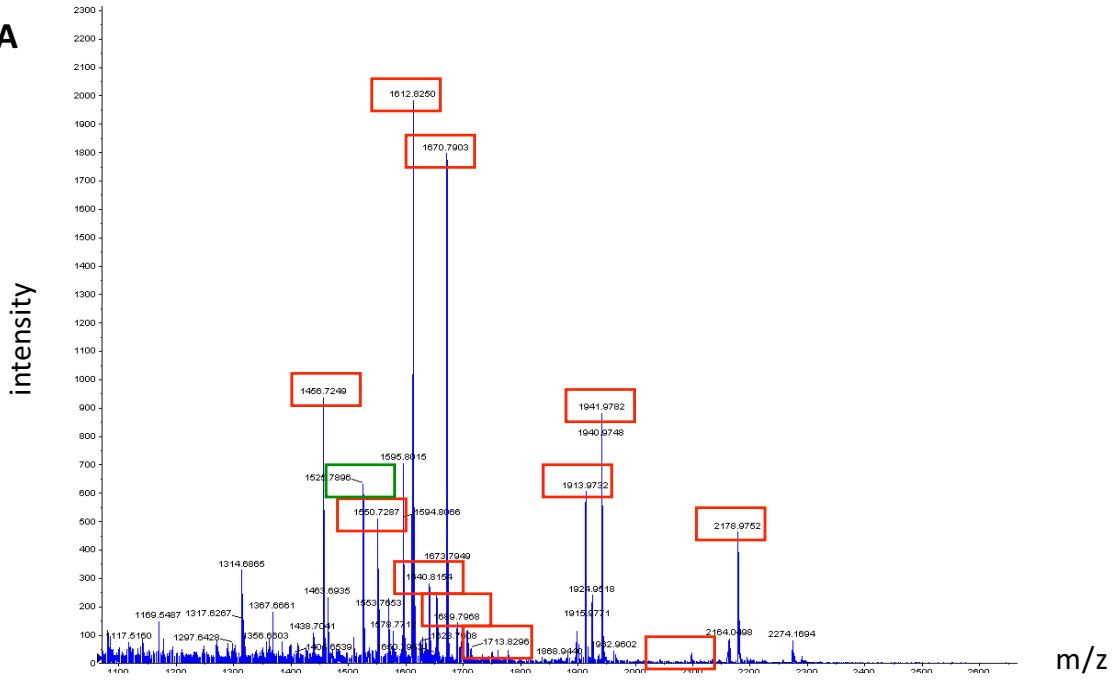**B**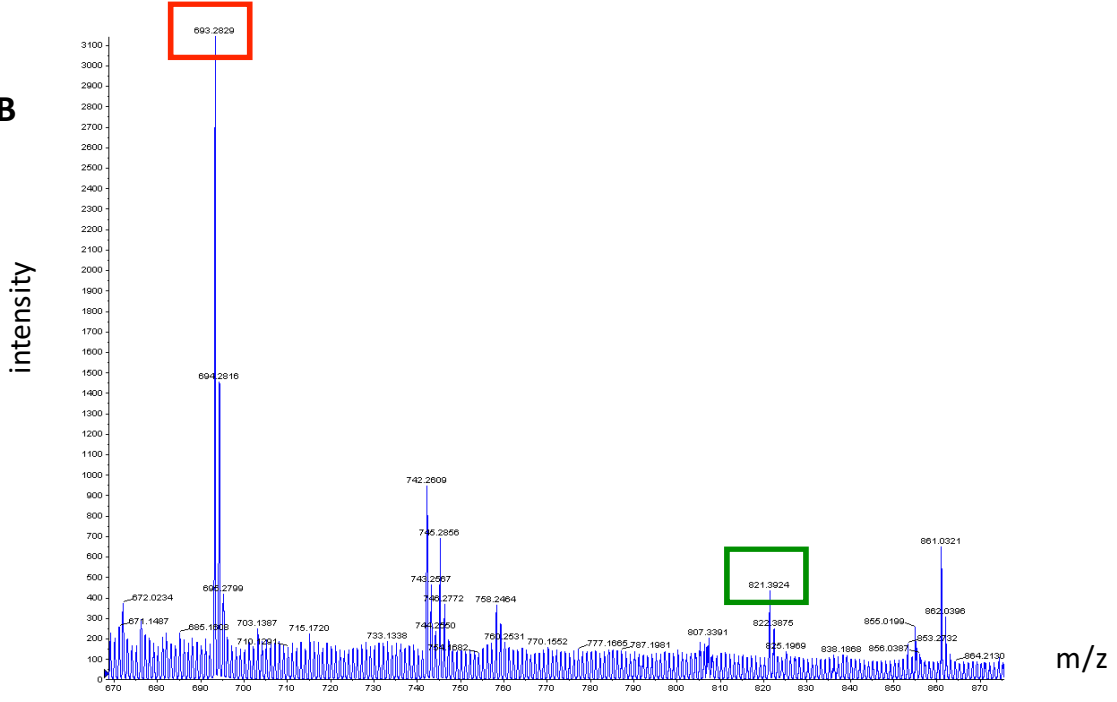

Supplement: pone.0157024.s001.pdf [file pone.0157024.s001.pdf]
